# Supplementary material
Source: PubMed Central journal article supplement (PMC9751760)
Supplement: mmc1.pdf [file mmc1.pdf]

# THE LANCET

## **Supplementary appendix**

This appendix formed part of the original submission and has been peer reviewed. We post it as supplied by the authors.

Supplement to: McKee M, Dunnell K, Anderson M, et al. The changing health needs of the UK population. *Lancet* 2021; published online May 6. [http://dx.doi.org/10.1016/S0140-6736\(21\)00229-4](http://dx.doi.org/10.1016/S0140-6736(21)00229-4).

## The Changing Health Needs of the UK Population Appendix 1

### Contents

|                                                                                                                                     |   |
|-------------------------------------------------------------------------------------------------------------------------------------|---|
| Figure 1a: Trends in life expectancy at birth in the four nations of the United Kingdom, females .....                              | 1 |
| Figure 1b: Trends in life expectancy at birth in the four nations of the United Kingdom, males .....                                | 1 |
| Figure 2a: Life expectancy, healthy life expectancy, and disability-free life expectancy across the UK, 2016 to 2018, females ..... | 2 |
| Figure 2b: Life expectancy, healthy life expectancy, and disability-free life expectancy across the UK, 2016 to 2018 males.....     | 2 |
| Figure 3 Maternal Mortality in the United Kingdom and comparable high-income countries (2018 or latest year available) .....        | 3 |
| Figure 4: Percentage of people within selected age groups by ethnic group .....                                                     | 3 |
| References .....                                                                                                                    | 4 |

Figure 1a: Trends in life expectancy at birth in the four nations of the United Kingdom, females

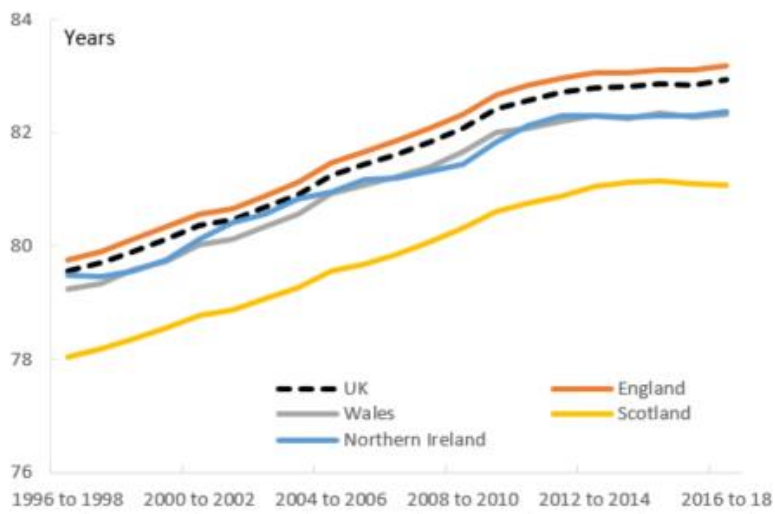

Source: Office for National Statistics (ONS)<sup>1</sup>

Figure 1b: Trends in life expectancy at birth in the four nations of the United Kingdom, males

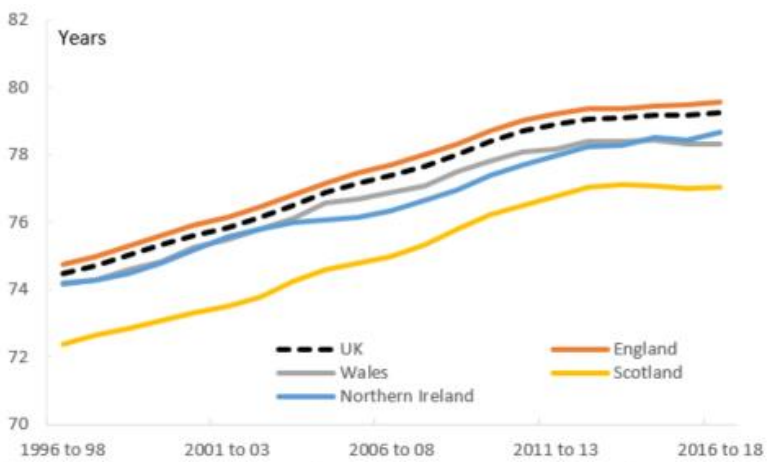

Source: Office for National Statistics (ONS)<sup>1</sup>

**Figure 2a: Life expectancy, healthy life expectancy, and disability-free life expectancy across the UK, 2016 to 2018, females**

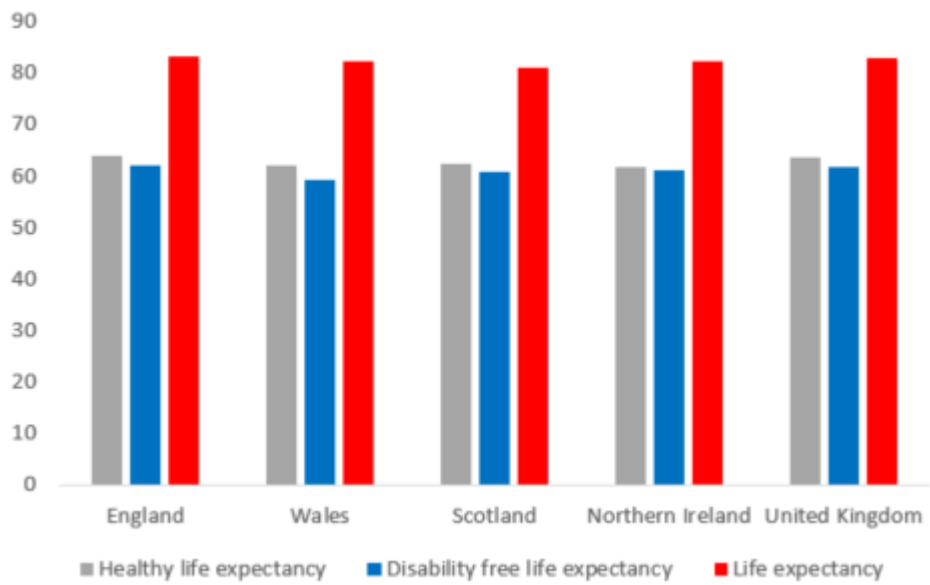

Source: Office for National Statistics (ONS)<sup>2</sup>

**Figure 2b: Life expectancy, healthy life expectancy, and disability-free life expectancy across the UK, 2016 to 2018 males**

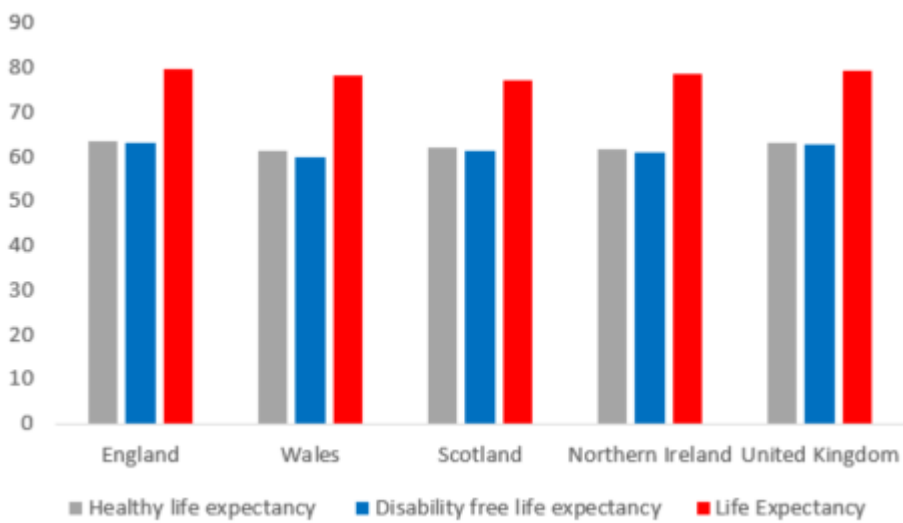

Source: Office for National Statistics (ONS)<sup>2</sup>

**Figure 3 Maternal Mortality in the United Kingdom and comparable high-income countries (2018 or latest year available)**

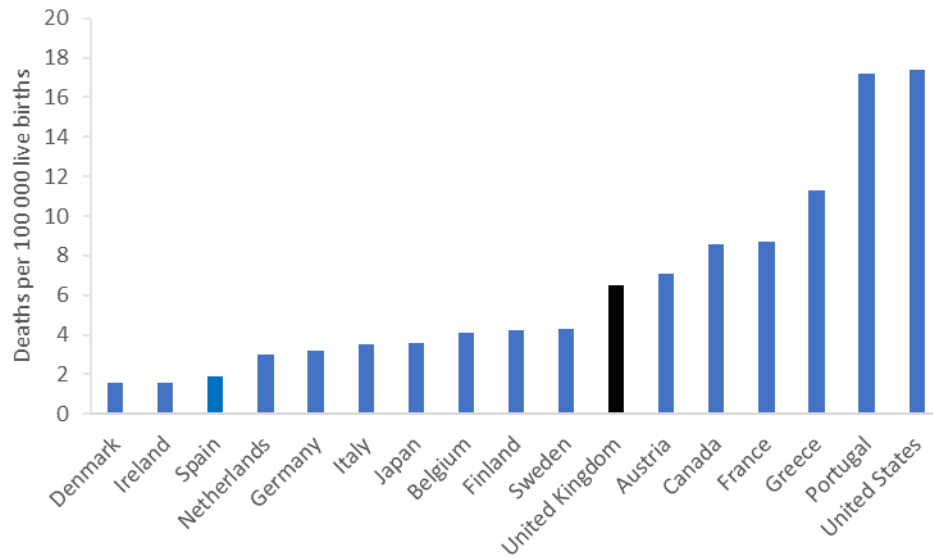

Source: Organisation for Economic Co-operation and Development (OECD) <sup>3</sup>

**Figure 4: Percentage of people within selected age groups by ethnic group**

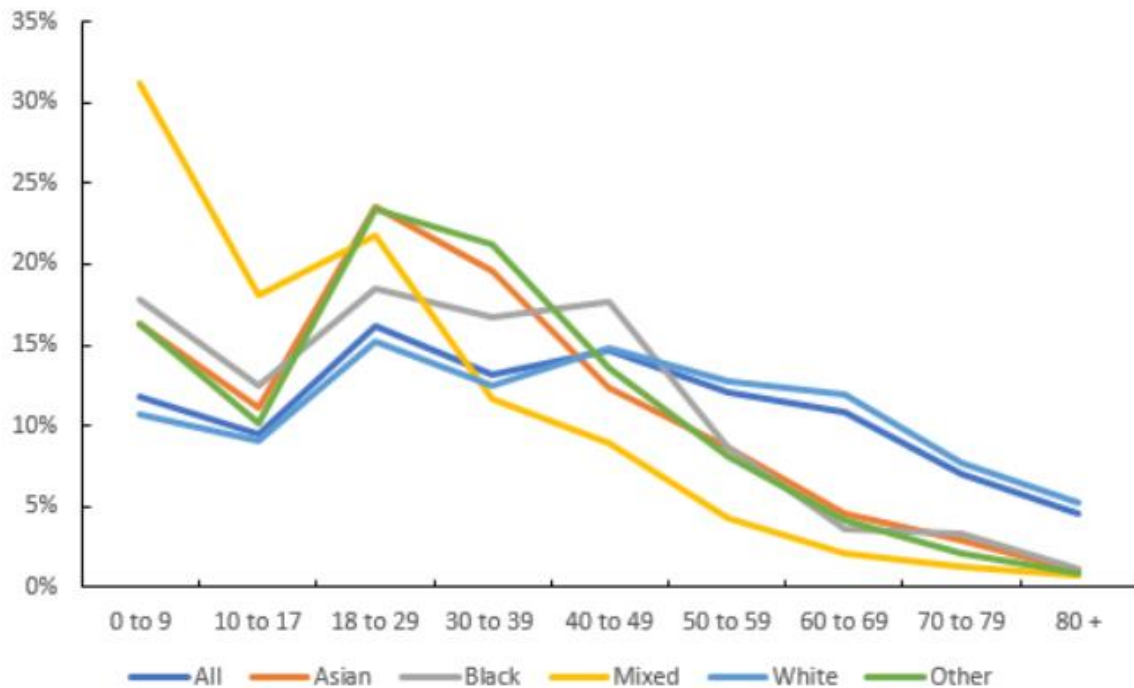

Source: England and Wales 2011 Census<sup>4</sup>

## References

- 1 Office for National Statistics. National life tables, UK. 2019. <https://www.ons.gov.uk/peoplepopulationandcommunity/birthsdeathsandmarriages/lifeexpectancies/bulletins/nationallifetablesunitedkingdom/2016to2018> (accessed Nov 17, 2020).
- 2 Office for National Statistics. Health and life expectancies, UK: 2016 to 2018. <https://www.ons.gov.uk/peoplepopulationandcommunity/healthandsocialcare/healthandlifeexpectancies> (accessed Nov 17, 2020).
- 3 OECD Health Statistics 2018 - OECD. <http://www.oecd.org/els/health-systems/health-data.htm> (accessed Nov 17, 2020).
- 4 UK Government. Census 2011: Age groups. 2018. <https://www.ethnicity-facts-figures.service.gov.uk/uk-population-by-ethnicity/demographics/age-groups/latest> (accessed Nov 17, 2020).
